# Supplementary material
Source: Springer Nature journal article supplement (https://www.springermedizin.de/resource/supplementary/12936_2007_508_MOESM1_ESM.pdf/9548142)

**A**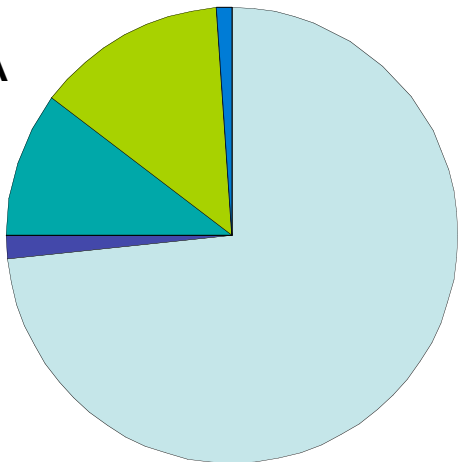**B**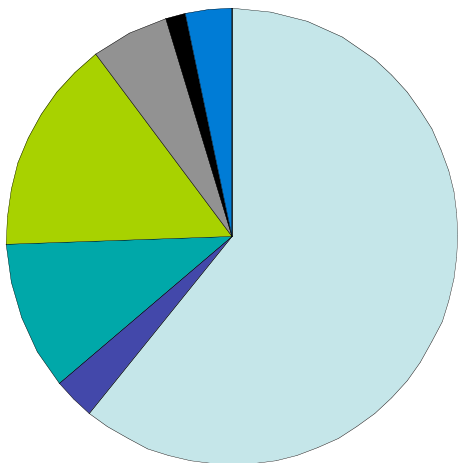

- Original clinic
- Dispensary
- Shop
- Traditional medicine
- Hospital
- Relative
- Other

Supplement: MOESM1 [file 9548142]
